# Supplementary material for: Aging-related markers in rat urine revealed by dynamic metabolic profiling using machine learning
Source: publisher site journal article supplement (doi:10.18632/aging.203046), 2021-05-19
Supplement: Supplementary file [file aging-v13i10-203046-supplementary-material-SD1.pdf]

## SUPPLEMENTARY FIGURES

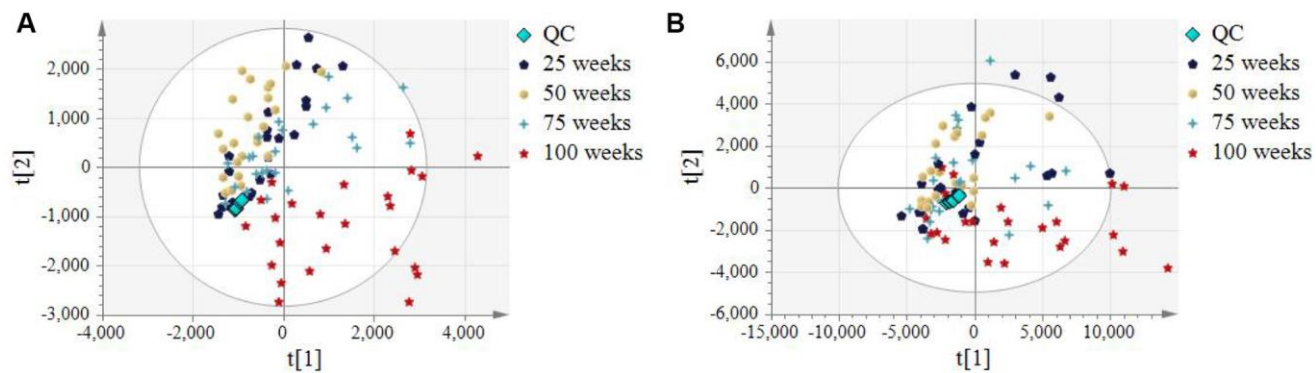

**Supplementary Figure 1. PCA scores plots of urine obtained from the UPLC-Q-TOF-MS. PCA score plots including quality control (QC) samples and experimental samples of time data in (A) the positive mode and (B) the negative mode.**

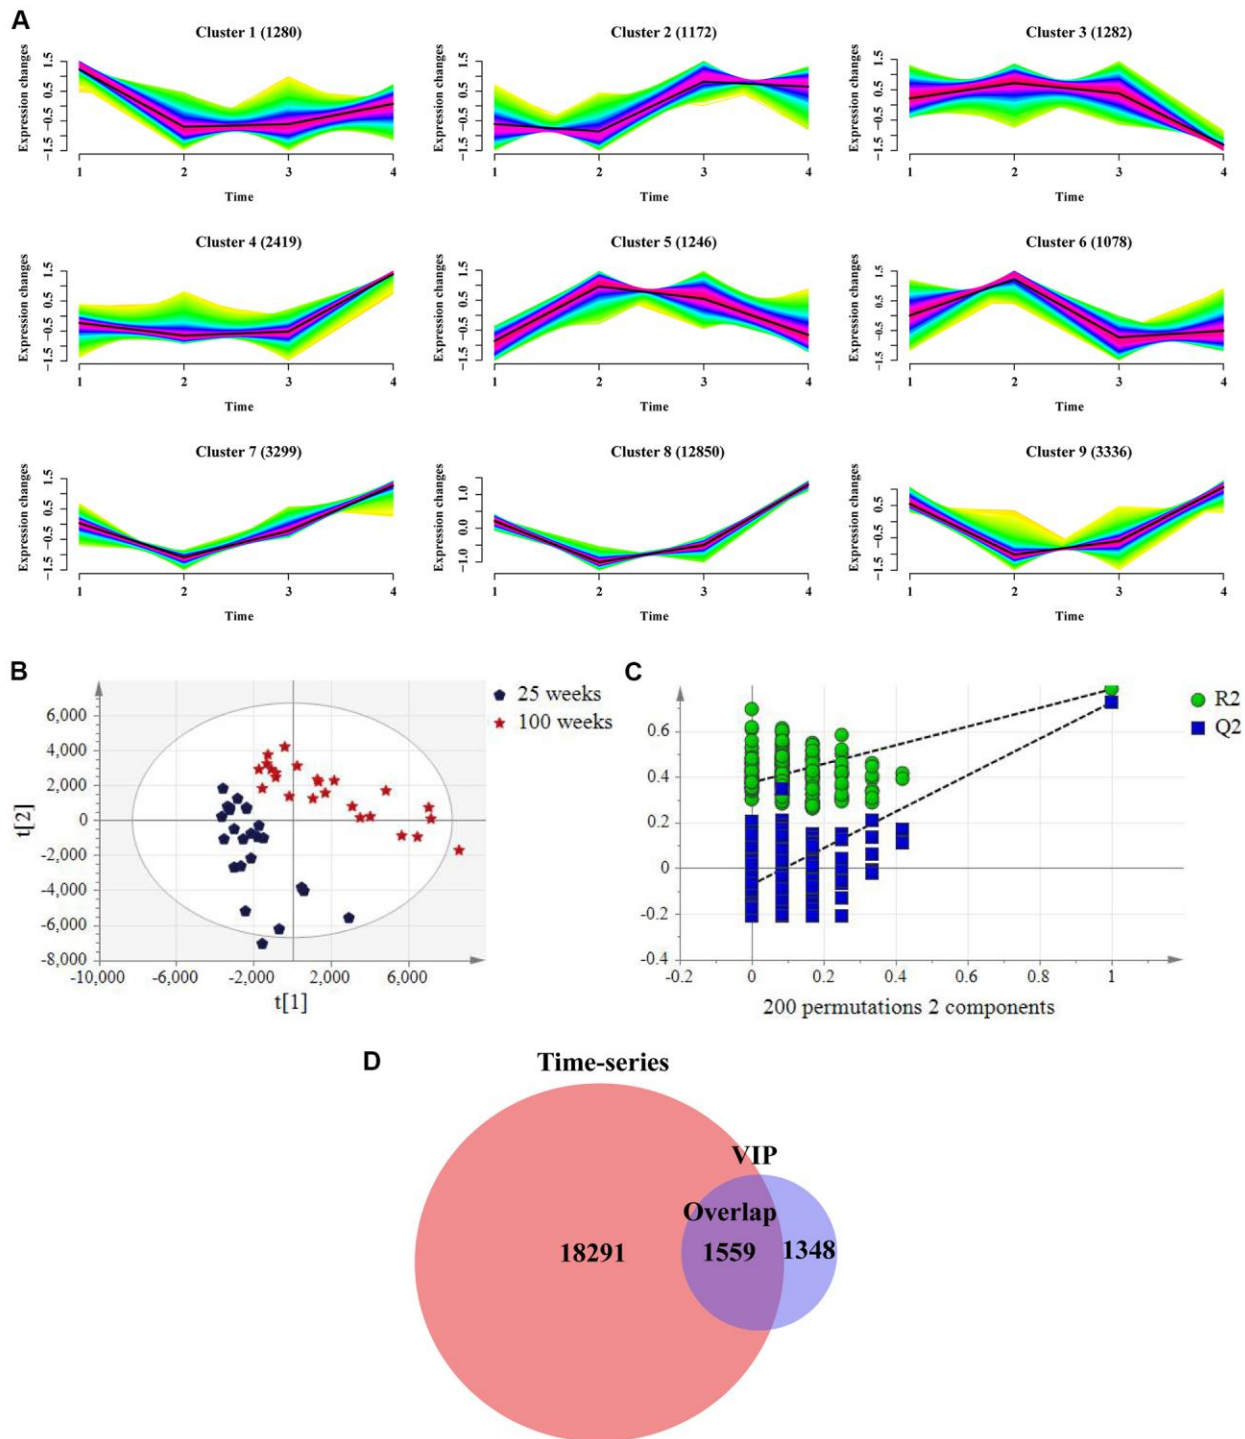

**Supplementary Figure 2. Screening metabolites in combination with time-series analysis and variable importance in the project (VIP) value in the positive mode in the training group. (A)** Metabolic aging trajectories. Fuzzy c-mean clustering of all 27962 metabolite abundances. Average trend of clusters is shown as a black line. **(B)** PLS-DA scores plots of rat urine at 25 weeks and 100 weeks. (ESI+, R2Y= 0.784, Q2 = 0.727). (n = 24 each time point). **(C)** Permutation test with 2 components of PLS-DA score plot. **(D)** Venn diagrams demonstrated the overlap of metabolites in combination with two algorithms.

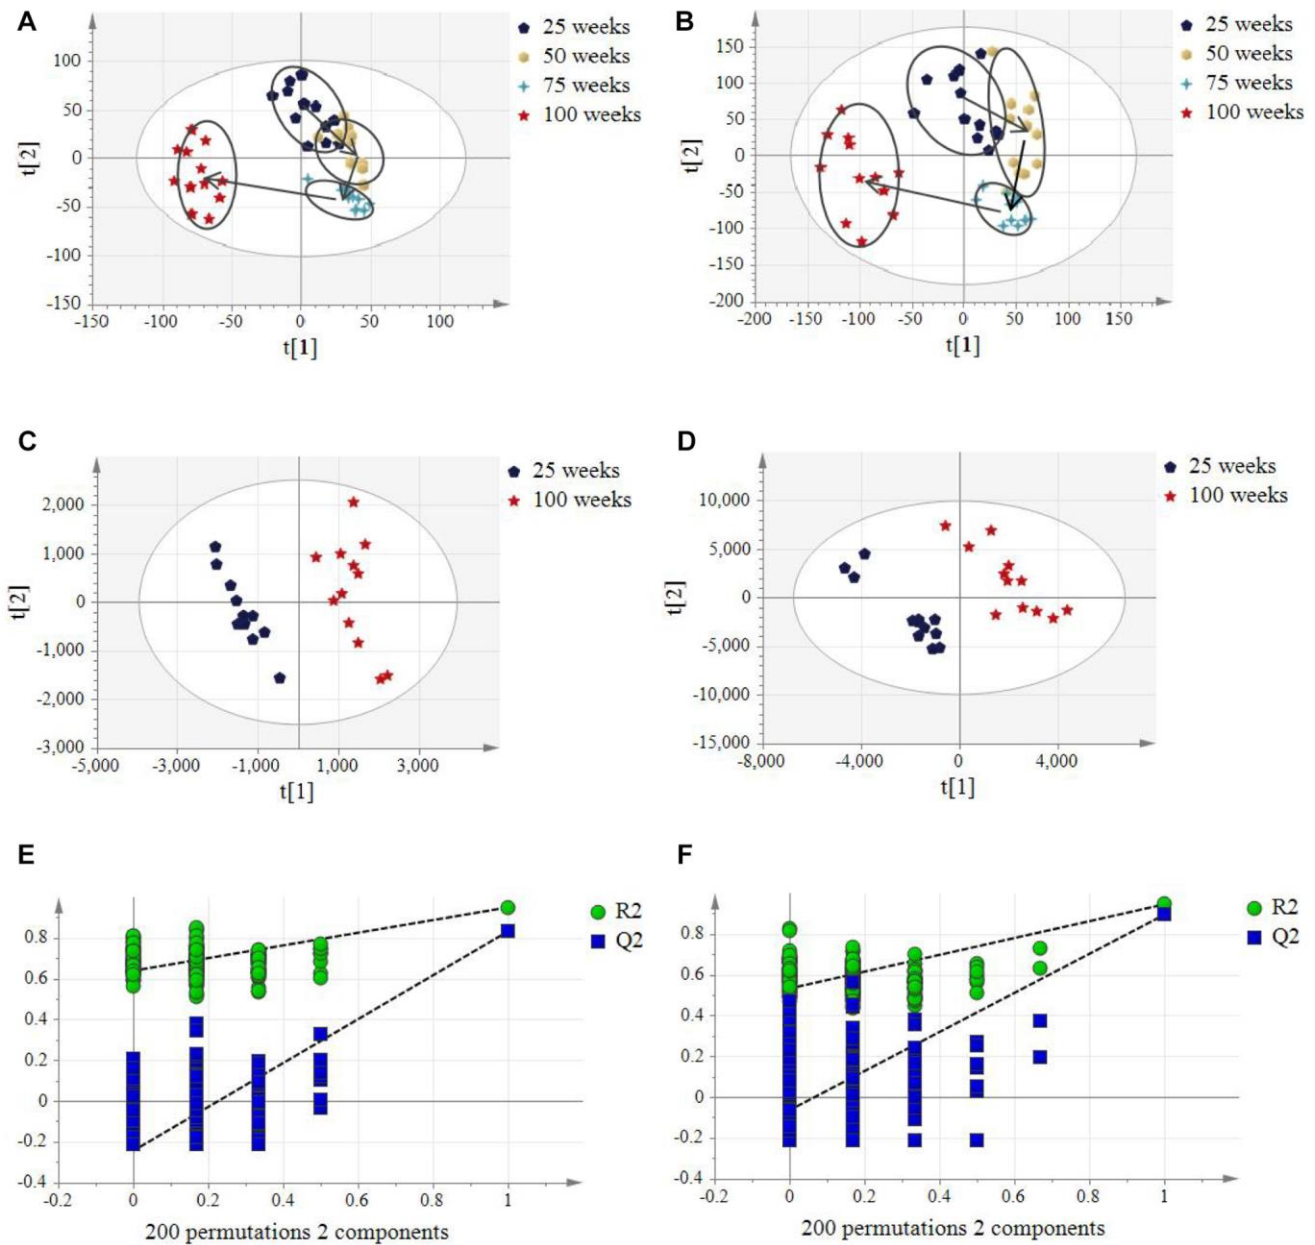

**Supplementary Figure 3. Aging trajectories in the negative and positive modes in the test group.** (A–B) PLS-DA scores plots of urine obtained from the UPLC-Q-TOF-MS with aging in (A) left: the negative mode, and (B) right: the positive mode in the test group. ( $n = 12$  each time point) (C–D) PLS-DA scores plots at 25 weeks and 100 weeks in (C) left: the negative mode, and (D) right: the positive mode in test group. (ESI–,  $R^2Y = 0.95$ ,  $Q^2 = 0.832$ ; ESI+,  $R^2Y = 0.946$ ,  $Q^2 = 0.895$ ). ( $n = 24$  each time point). (E–F) Permutation test with 2 components of PLS-DA scores plots related to Figure C and D in (E) left: the negative mode, and (F) right: the positive mode in the test group.

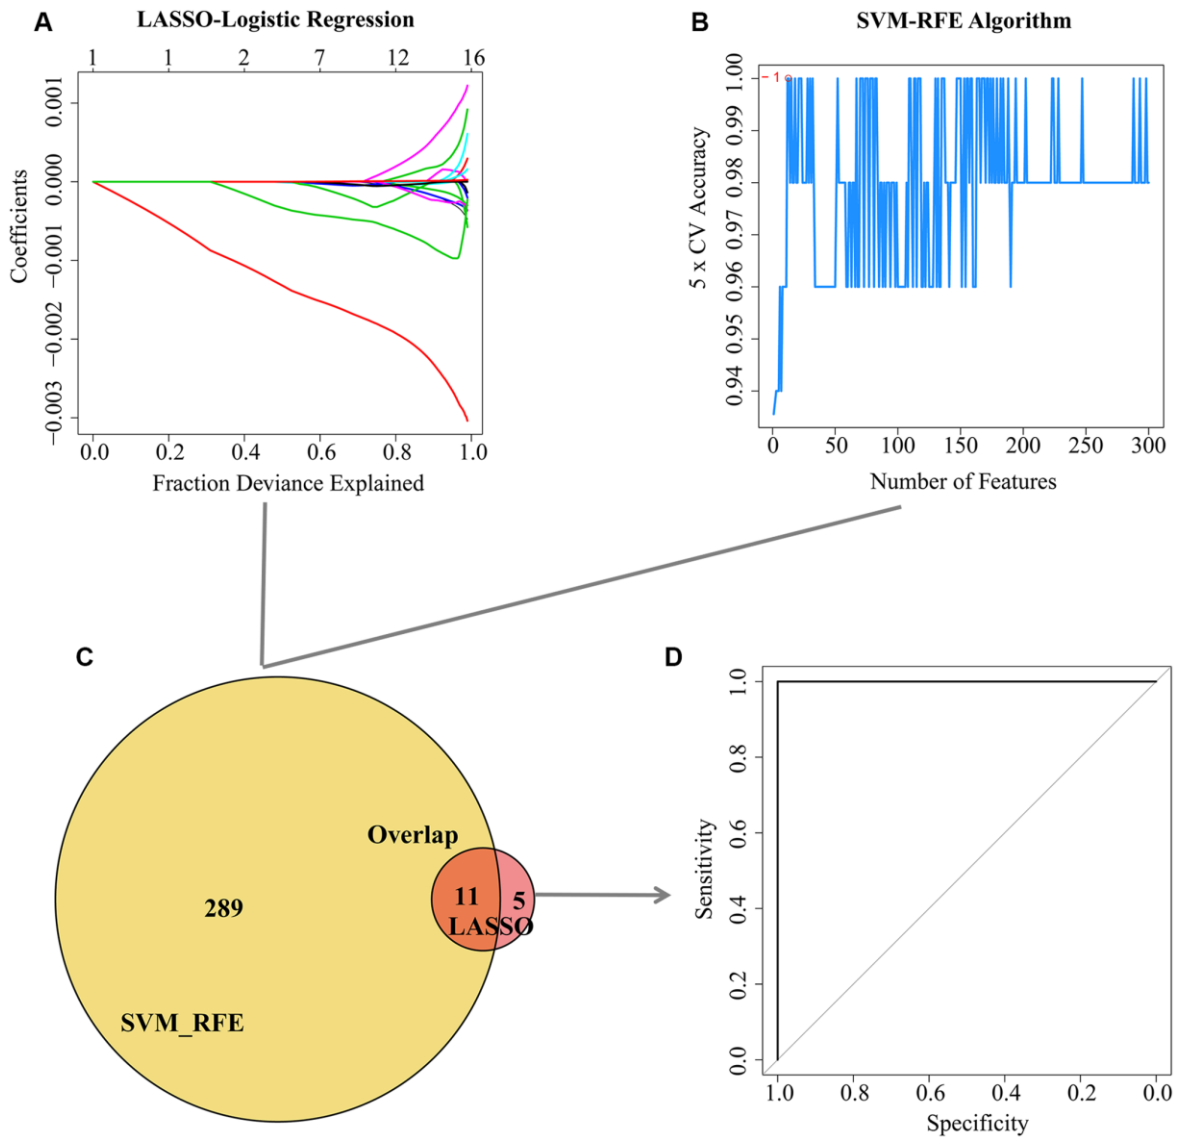

**Supplementary Figure 4. Two algorithms based on machine learning were used for feature selection in the positive mode. (A)** Least Absolute Shrinkage and Selector Operation (LASSO) algorithm in the training group. **(B)** Support Vector Machine-Recursive Feature Elimination (SVM-RFE) algorithm in the training group. **(C)** Venn diagrams demonstrated the overlap of metabolites in combination with two algorithms. **(D)** 11 candidate metabolites detected in the training group were validated in the test group using receiver operator characteristic (ROC) curve analysis.
